# Supplementary material for: Mislocalized cytoplasmic p27 activates PAK1‐mediated metastasis and is a prognostic factor in osteosarcoma
Source: PubMed Central journal article supplement (PMC7138393; doi:10.1002/1878-0261.12624), 2020-02-14
Supplement: MOL2-14-846-s001.pdf [file MOL2-14-846-s001.pdf]

# Supplementary Figures and Tables

Chen *et al*, p27 mislocalization is a poor prognostic  
factor of osteosarcoma by activating PAK1-mediated  
metastasis

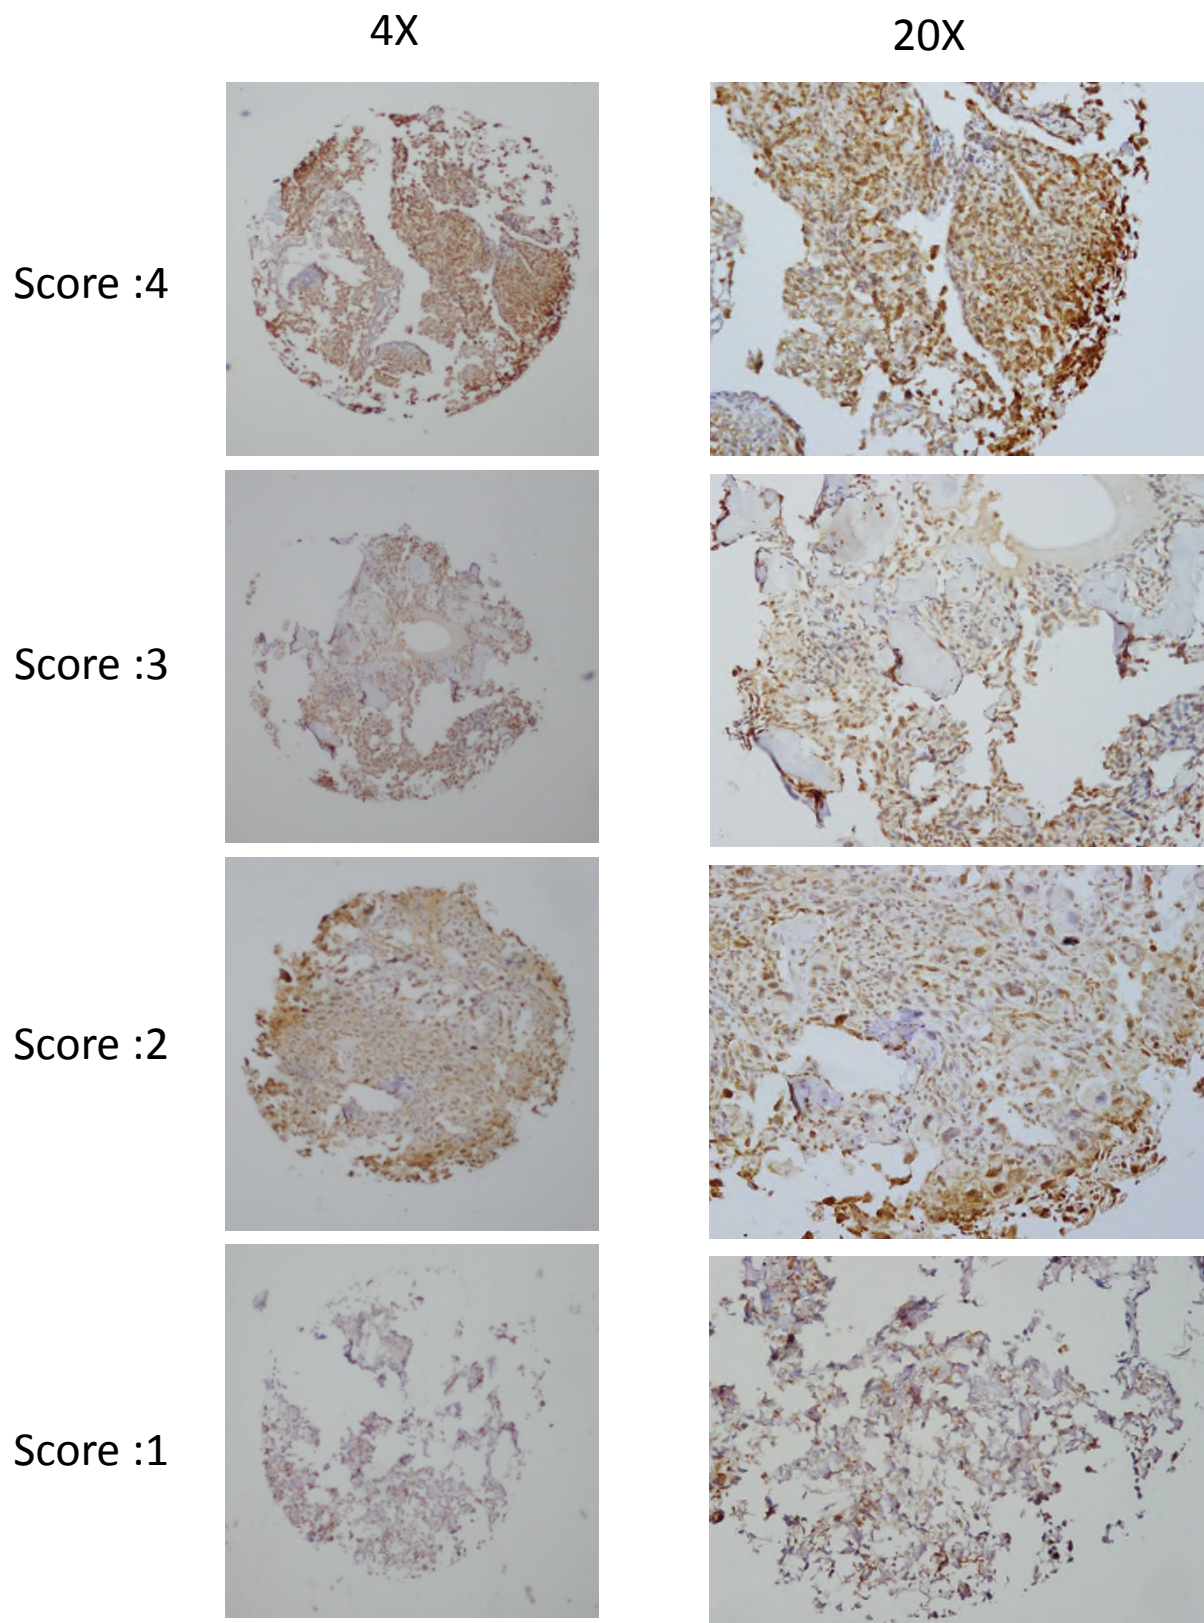

**Supplementary Figure S1A.** Representative images of tumor cores on the tissue microarray showing different proportion scores of p27 staining (brown) used in the survival analysis.

4X

20X

Negative

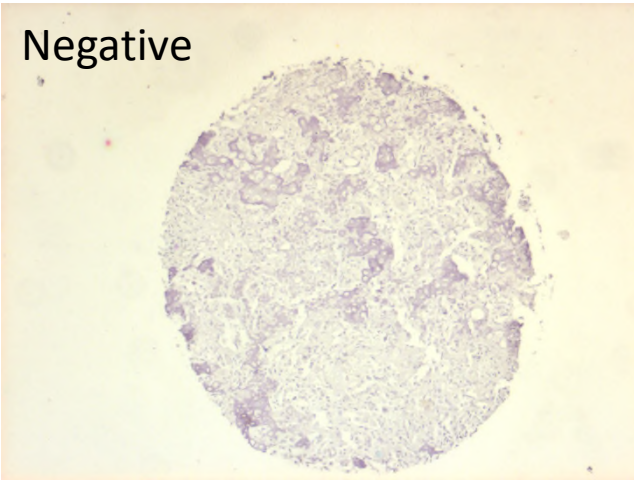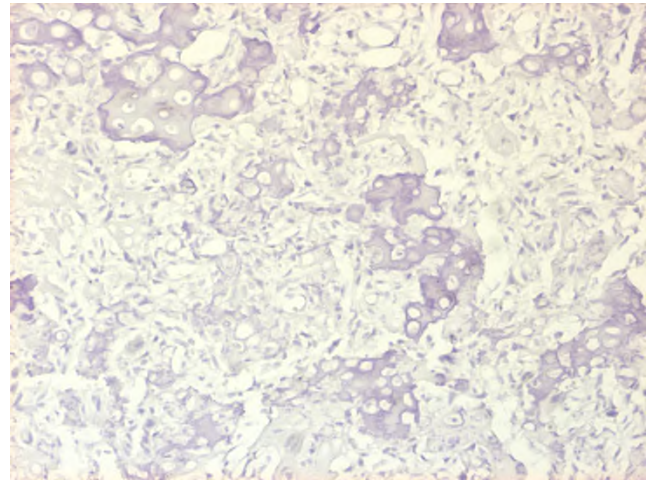

Neu

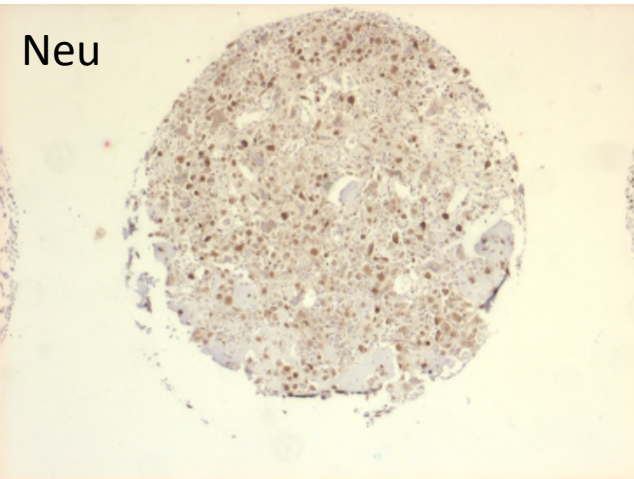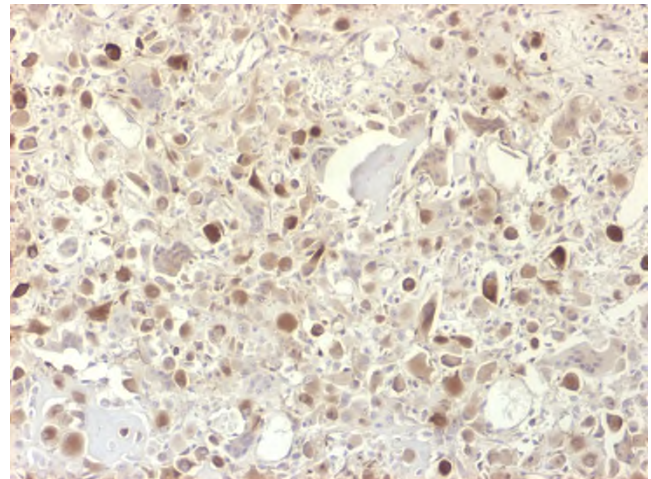

Cyto

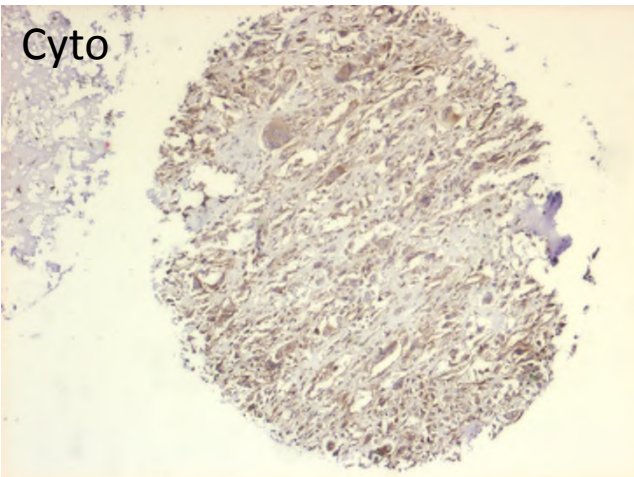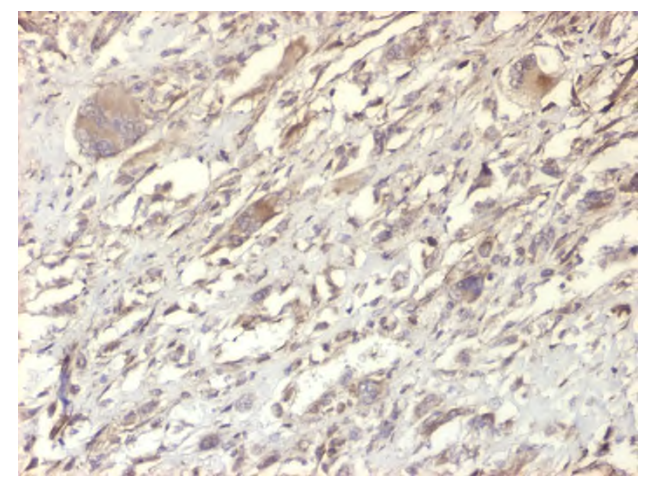

**Supplementary Figure S1B.** Representative images of tumor cores showing negative (Top), nuclear (Middle) and cytoplasmic (Bottom) IHC staining for p27 in the tissue microarray. Left and right columns show the lower (4X) and high (20X) power of magnification, respectively.

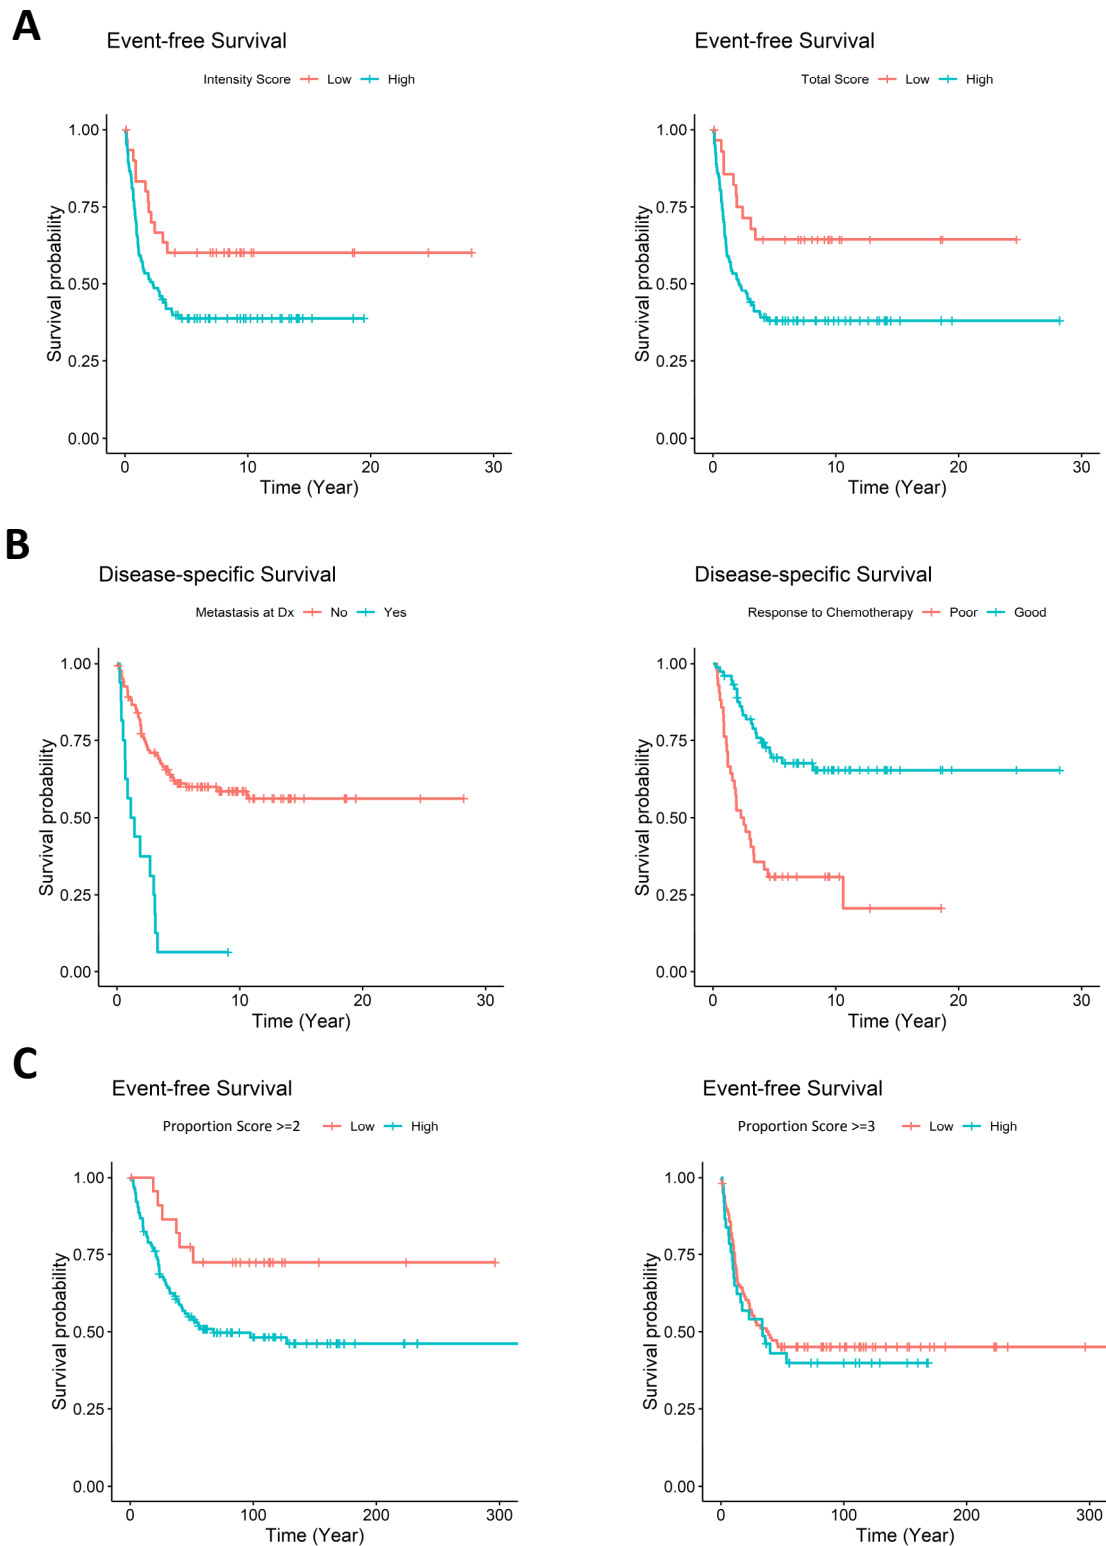

**Supplementary Figure S2.** Kaplan-Meier plots of cytoplasmic p27 in osteosarcoma tissue microarray. **A**, Event-free survival of intensity score ( $p=0.037$ , left) and total score ( $p=0.015$ , right) of cytoplasmic p27 in osteosarcoma cases. **B**, Disease-specific survival of metastasis at diagnosis ( $p=2.29E-07$ , left) and histologic response ( $p=7.66E-06$ , right) in osteosarcoma cases. **C**, Event-free survival of cytoplasmic p27 proportion score with cutoff  $\geq 2$  ( $p=0.10$ , left) and 3 ( $p=0.55$ , right).

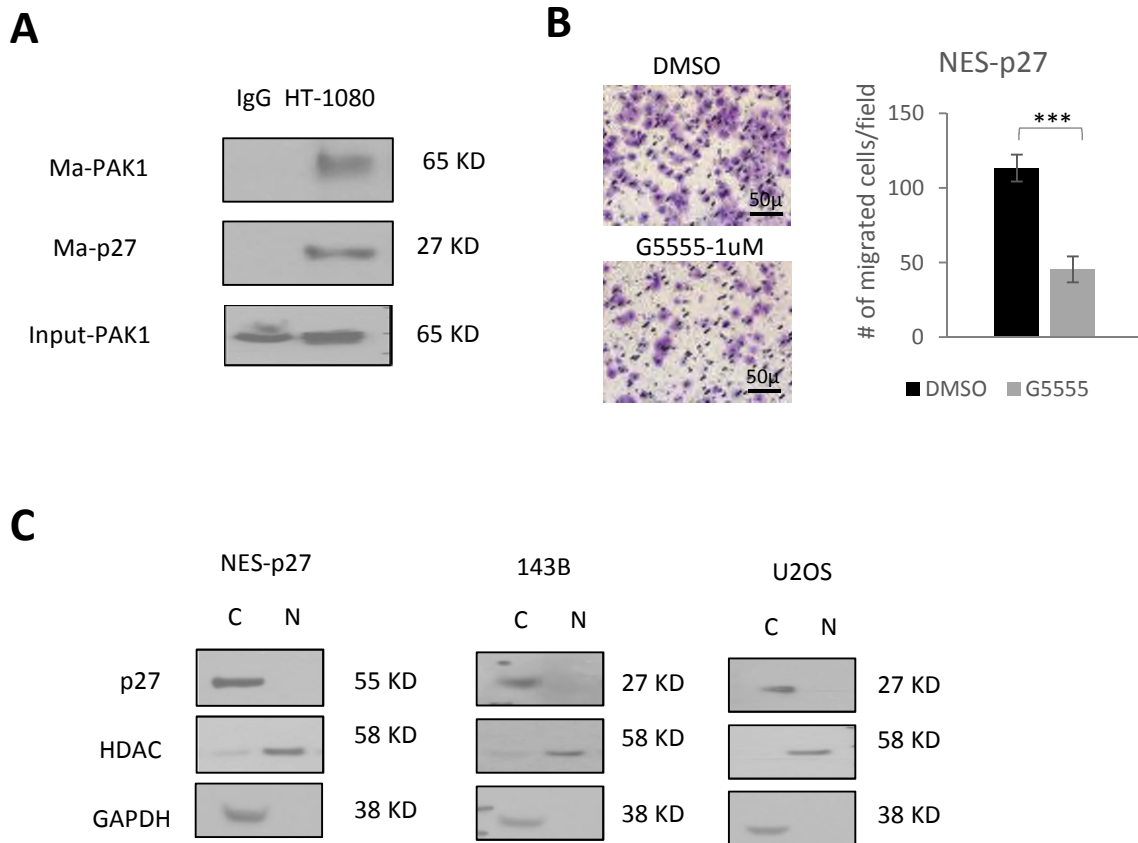

**Supplementary Figure S3. A**, Western blots of PAK1 in p27-immunoprecipitated proteins in HT-1080. The pulldown assay was performed by rabbit p27 antibody (Ra-p27), whereas same amount of cell lysis incubated with rabbit IgG was used as a negative control. PAK1 was detected by mouse PAK1 monoclonal antibody (Ma-PAK1). Mouse monoclonal antibody p27 antibody (Ma-p27) was used as an immunoprecipitation control and total PAK1 expression was used as an input control. **B**, Representative images (left) and quantification (right) of transwell migration assays of NES-p27 cells treated with 1 $\mu$ M of the Group I PAK inhibitor (G5555) or the vehicle control (DMSO). Migrated cells were stained, counted, and averaged using ImageJ 1.51K-IHC tool box (NIH) software in five random and independent microscopic fields (10X). Error bars represent standard deviations and asterisks denote statistical significance of the cell counts in the five fields (student-t test,  $p < 0.001$ ). The experiments were replicated three times. **C**, Fractionated Western blots of three OS cell lines (NES-p27, U2OS and 143B). HDAC and GAPDH were used as nuclear (N) and cytoplasmic (C) loading controls, respectively.

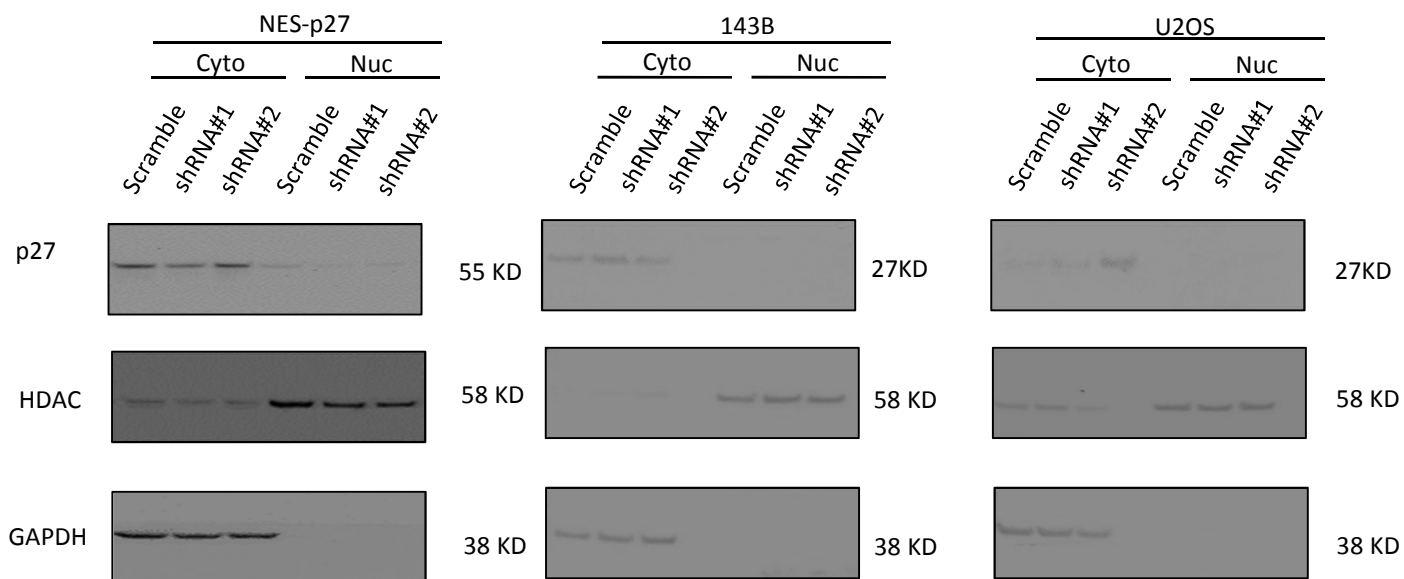

**Supplementary Figure S4.** Subcellular fractionation followed by Western blotting of p27 on PAK1 shRNA (shRNA#1 and #2) and scramble mutants of three osteosarcoma cell lines (NES-p27, 143B and U2OS). GAPDH and HDAC were used as cytoplasmic and nuclear protein controls, respectively.

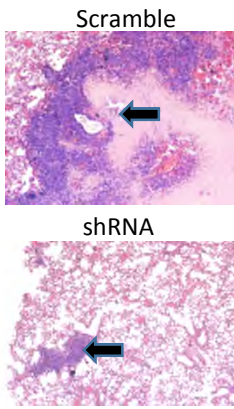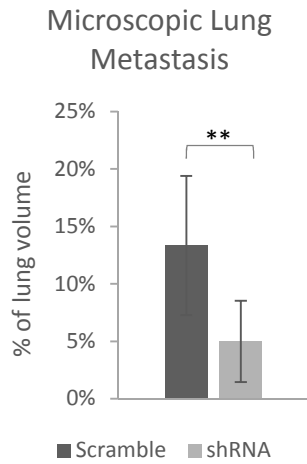

**Supplementary Figure S5.** Lung metastasis of mice injected with HT-1080 harboring PAK1-shRNA or scramble shRNA control. Four weeks after injection, mice were sacrificed and mouse lungs were harvested and examined by H & E staining to evaluate the presence of microscopic metastatic foci. Representative H & E staining images of metastatic nodules (20X) were shown (Arrow, left). The percentage of total lung volume occupied by tumor cells was counted and compared between the scramble and shRNA groups (Student's t-test,  $p < 0.01$ , right).

Supplementary Table S1. Comparison of demographic factors and histologic subtypes with p27 proportion score. p-values for gender, race and histologic subtypes were calculated by 2-sided fisher-exact tests and p-value for age were calculated by a 2-sided student's t-test.

| Demographics           |                  | p27 Proportion Score |       | <i>p</i> -value |
|------------------------|------------------|----------------------|-------|-----------------|
|                        |                  | Low                  | High  |                 |
| Gender                 |                  |                      |       |                 |
|                        | Female           | 12                   | 57    | 1               |
|                        | Male             | 11                   | 56    |                 |
| Race                   |                  |                      |       |                 |
|                        | African-American | 0                    | 17    | 0.068           |
|                        | Caucasian        | 22                   | 93    |                 |
|                        | Other            | 1                    | 3     |                 |
| Histologic subtype     |                  |                      |       |                 |
|                        | Chondroblastic   | 3                    | 21    | 0.363           |
|                        | Fibroblastic     | 5                    | 27    |                 |
|                        | Osteoblastic     | 7                    | 45    |                 |
|                        | Other            | 8                    | 20    |                 |
| Age (mean±stdev, year) |                  | 25±17                | 23±15 | 0.507           |



Supplementary Table S2. Results of the p27 immunoprecipitation followed by mass spectrometry to show cytoplasmic p27 interacting proteins uniquely present in the p27-mislocalized osteosarcoma cell line NES-p27 relative to the empty vector control. Only the proteins with at least two identified peptides are shown in the table. Cyclin-dependent kinase inhibitor 1B (p27) is shown in red and PAK1 is shown in bold.

| Rank      | NCBI gi no.     | Protein Name                                                                       | Peptide Hits |           |
|-----------|-----------------|------------------------------------------------------------------------------------|--------------|-----------|
|           |                 |                                                                                    | Empty Vector | NES-p27   |
|           | <b>4757962</b>  | <b>cyclin-dependent kinase inhibitor 1B</b>                                        | <b>26</b>    | <b>62</b> |
| 1         | 57013276        | tubulin alpha-1B chain                                                             |              | 150       |
| 2         | 171460916       | dynammin-1-like protein isoform 2                                                  |              | 48        |
| 3         | 119703753       | keratin, type II cytoskeletal 6B                                                   |              | 40        |
| 4         | 285395246       | tubulin alpha chain-like 3 isoform 2                                               |              | 37        |
| 5         | 209969836       | transportin-2 isoform 2                                                            |              | 32        |
| 6         | 109148552       | keratin, type II cytoskeletal 3                                                    |              | 23        |
| 7         | 83641870        | nucleophosmin isoform 3                                                            |              | 22        |
| 8         | 38201625        | eukaryotic translation initiation factor 4 gamma 1 isoform 3                       |              | 21        |
| 9         | 419636284       | AP-3 complex subunit beta-1 isoform 2                                              |              | 20        |
| 10        | 163310745       | LIM and calponin homology domains-containing protein 1 isoform c                   |              | 18        |
| 11        | 5453880         | acidic leucine-rich nuclear phosphoprotein 32 family member A                      |              | 17        |
| 12        | 6005743         | ATP-dependent RNA helicase DDX19B isoform 1                                        |              | 16        |
| 13        | 21536301        | signal transducer and activator of transcription 1-alpha/beta isoform beta (STAT1) |              | 14        |
| 14        | 23111038        | sorting nexin-2 isoform 1                                                          |              | 14        |
| 15        | 112382257       | inaD-like protein                                                                  |              | 13        |
| 16        | 24430146        | nuclear pore complex protein Nup153 isoform 2                                      |              | 13        |
| 17        | 33469968        | DNA replication licensing factor MCM7 isoform 1                                    |              | 12        |
| 18        | 28144897        | adenylate kinase isoenzyme 5 isoform 1                                             |              | 12        |
| 19        | 13569879        | acidic leucine-rich nuclear phosphoprotein 32 family member E isoform 1            |              | 12        |
| 20        | 459352730       | POTE ankyrin domain family member J                                                |              | 11        |
| 21        | 53729363        | E3 ubiquitin-protein ligase LRSAM1 isoform 1                                       |              | 11        |
| 22        | 372466577       | keratin, type II cytoskeletal 8 isoform 2                                          |              | 11        |
| 23        | 33598968        | LIM domain only protein 7 isoform 1                                                |              | 10        |
| 24        | 394582099       | DNA replication licensing factor MCM3 isoform 2                                    |              | 10        |
| <b>25</b> | <b>42794769</b> | <b>serine/threonine-protein kinase PAK 1</b>                                       |              | <b>9</b>  |
| 26        | 6598323         | rab GDP dissociation inhibitor beta isoform 1                                      |              | 9         |
| 27        | 39995059        | caspase-2 isoform 1 preproprotein                                                  |              | 9         |
| 28        | 15011972        | rho guanine nucleotide exchange factor 1 isoform 2                                 |              | 9         |
| 29        | 289629267       | protein transport protein Sec23B isoform 2                                         |              | 9         |
| 30        | 67191208        | polyubiquitin-C                                                                    |              | 8         |
| 31        | 67782365        | keratin, type II cytoskeletal 7                                                    |              | 8         |
| 32        | 21536286        | creatine kinase B-type                                                             |              | 8         |
| 33        | 288915536       | plastin-1                                                                          |              | 8         |
| 34        | 46249376        | serine/threonine-protein phosphatase PP1-beta catalytic subunit isoform 1          |              | 8         |
| 35        | 5579478         | dual specificity mitogen-activated protein kinase kinase 1                         |              | 8         |
| 36        | 399154157       | striatin-interacting protein 1 isoform 2                                           |              | 8         |
| 37        | 16753215        | profilin-2 isoform a                                                               |              | 7         |
| 38        | 21361091        | ubiquitin carboxyl-terminal hydrolase isozyme L1                                   |              | 7         |
| 39        | 242247193       | SH2B adapter protein 2                                                             |              | 7         |
| 40        | 39930351        | dynammin-binding protein                                                           |              | 7         |
| 41        | 336176066       | RNA-binding protein 39 isoform d                                                   |              | 7         |
| 42        | 7524354         | N(G),N(G)-dimethylarginine dimethylaminohydrolase 2                                |              | 7         |
| 43        | 50083291        | amyloid beta A4 precursor protein-binding family B member 2 isoform c              |              | 7         |
| 44        | 7019569         | vacuolar protein sorting-associated protein 4A                                     |              | 7         |
| 45        | 351721296       | protein SET isoform 3                                                              |              | 7         |

|     |           |                                                                       |   |
|-----|-----------|-----------------------------------------------------------------------|---|
| 46  | 215598688 | ubiquitin carboxyl-terminal hydrolase 13                              | 7 |
| 47  | 4504901   | importin subunit alpha-4                                              | 7 |
| 48  | 21040371  | ATP-dependent RNA helicase DDX39A                                     | 7 |
| 49  | 18375623  | spliceosome RNA helicase DDX39B                                       | 7 |
| 50  | 50658065  | structural maintenance of chromosomes protein 4                       | 6 |
| 51  | 5803080   | macrophage receptor MARCO                                             | 6 |
| 52  | 87578394  | microtubule-associated protein 2 isoform 5                            | 6 |
| 53  | 354681995 | C-Jun-amino-terminal kinase-interacting protein 4 isoform 4           | 6 |
| 54  | 22538459  | nuclear receptor coactivator 1 isoform 3                              | 6 |
| 55  | 100913206 | ATP-dependent RNA helicase A                                          | 6 |
| 56  | 166197690 | ephexin-1 isoform 2                                                   | 6 |
| 57  | 215490056 | bifunctional protein NCOAT isoform b                                  | 6 |
| 58  | 347543829 | dihydropyrimidinase-related protein 2 isoform 3                       | 6 |
| 59  | 40316915  | aminopeptidase B                                                      | 6 |
| 60  | 282398114 | breast cancer anti-estrogen resistance protein 1 isoform 2            | 6 |
| 61  | 198041728 | kinesin light chain 2 isoform 2                                       | 5 |
| 62  | 94721263  | myotubularin-related protein 12                                       | 5 |
| 63  | 40354195  | keratin, type I cytoskeletal 18                                       | 5 |
| 64  | 222136585 | protein timeless homolog                                              | 5 |
| 65  | 46909584  | cAMP-dependent protein kinase catalytic subunit alpha isoform 2       | 5 |
| 66  | 190194412 | thyroid receptor-interacting protein 11                               | 5 |
| 67  | 7656952   | calcyclin-binding protein isoform 1                                   | 5 |
| 68  | 194239668 | SHC-transforming protein 1 isoform 4                                  | 5 |
| 69  | 4507783   | ubiquitin-conjugating enzyme E2 H isoform 1                           | 5 |
| 70  | 74027251  | E3 ubiquitin-protein ligase TRIM33 isoform beta                       | 5 |
| 71  | 10092601  | eukaryotic translation initiation factor 4 gamma 3 isoform 3          | 5 |
| 72  | 156071452 | nardilysin isoform b precursor                                        | 5 |
| 73  | 4759270   | translin isoform 1                                                    | 5 |
| 74  | 259906440 | zinc finger CCCH-type antiviral protein 1-like                        | 5 |
| 75  | 344030204 | ras-related protein Rab-6A isoform c                                  | 5 |
| 76  | 5729980   | phosphomevalonate kinase                                              | 5 |
| 77  | 20070376  | putative sodium-coupled neutral amino acid transporter 10 isoform b   | 5 |
| 78  | 195546902 | transcription elongation factor SPT5 isoform b                        | 5 |
| 79  | 5031569   | alpha-centractin                                                      | 5 |
| 80  | 196114951 | tyrosine-protein phosphatase non-receptor type 12 isoform 1           | 5 |
| 81  | 323276651 | katanin p60 ATPase-containing subunit A1 isoform 2                    | 5 |
| 82  | 23111041  | sorting nexin-3 isoform b                                             | 5 |
| 83  | 62198241  | protein CutA isoform 1                                                | 5 |
| 84  | 62198235  | drebrin-like protein isoform b                                        | 4 |
| 85  | 6912604   | acidic leucine-rich nuclear phosphoprotein 32 family member C         | 4 |
| 86  | 197209857 | AP-3 complex subunit mu-2                                             | 4 |
| 87  | 23308579  | prostaglandin E synthase 3                                            | 4 |
| 88  | 256600202 | rap guanine nucleotide exchange factor 6 isoform 5                    | 4 |
| 89  | 197333879 | genetic suppressor element 1 isoform 2                                | 4 |
| 90  | 289577109 | ADP-ribosylation factor-binding protein GGA3 isoform 1                | 4 |
| 91  | 223671888 | interleukin-1 receptor-associated kinase 4 isoform b                  | 4 |
| 92  | 149274651 | centrosomal protein of 78 kDa isoform b                               | 4 |
| 93  | 56550081  | mitotic checkpoint protein BUB3 isoform b                             | 4 |
| 94  | 373838727 | mini-chromosome maintenance complex-binding protein isoform 2         | 4 |
| 95  | 21493033  | A-kinase anchor protein 10, mitochondrial precursor                   | 4 |
| 96  | 66392203  | NME1-NME2 protein                                                     | 4 |
| 97  | 194733742 | negative elongation factor A                                          | 4 |
| 98  | 106507301 | DNA polymerase alpha catalytic subunit                                | 4 |
| 99  | 381388773 | amyloid beta A4 precursor protein-binding family B member 1 isoform c | 4 |
| 100 | 359807035 | TBC1 domain family member 1 isoform 2                                 | 4 |
| 101 | 6912478   | importin subunit alpha-7                                              | 4 |
| 102 | 15529984  | armadillo repeat-containing protein 6 isoform 2                       | 4 |

|     |           |                                                                                      |   |
|-----|-----------|--------------------------------------------------------------------------------------|---|
| 103 | 19923592  | oxysterol-binding protein-related protein 11                                         | 4 |
| 104 | 21541824  | transducin-like enhancer protein 1                                                   | 4 |
| 105 | 110578655 | protein zwilch homolog                                                               | 4 |
| 106 | 6912494   | microtubule-associated protein RP/EB family member 1                                 | 4 |
| 107 | 109633028 | serine/threonine-protein kinase MST4 isoform 2                                       | 4 |
| 108 | 7661914   | 26S proteasome non-ATPase regulatory subunit 6 isoform 2                             | 4 |
| 109 | 20149496  | EF-hand domain-containing protein D1 isoform 1                                       | 4 |
| 110 | 5802968   | protein AF1q                                                                         | 4 |
| 111 | 4502011   | adenylate kinase isoenzyme 1                                                         | 4 |
| 112 | 21361837  | PITH domain-containing protein 1                                                     | 4 |
| 113 | 410171504 | PREDICTED: hornerin                                                                  | 4 |
| 114 | 109255228 | centrosomal protein of 170 kDa isoform alpha                                         | 4 |
| 115 | 397137355 | PREDICTED: keratin, type II cuticular Hb3 isoform 2                                  | 4 |
| 116 | 58761500  | obg-like ATPase 1 isoform 1                                                          | 4 |
| 117 | 116008442 | zinc finger CCCH domain-containing protein 13                                        | 3 |
| 118 | 209977117 | netrin receptor UNC5D precursor                                                      | 3 |
| 119 | 29789255  | C-Maf-inducing protein isoform Tc-Mip                                                | 3 |
| 120 | 31657117  | serine/threonine-protein phosphatase 4 regulatory subunit 3A                         | 3 |
| 121 | 58530842  | desmoplakin isoform II                                                               | 3 |
| 122 | 237757326 | synaptojanin-1 isoform d                                                             | 3 |
| 123 | 194294525 | intersectin-2 isoform 2                                                              | 3 |
| 124 | 82659109  | E3 ubiquitin-protein ligase UBR4                                                     | 3 |
| 125 | 41327769  | rho guanine nucleotide exchange factor 18 isoform a                                  | 3 |
| 126 | 384871702 | DNA mismatch repair protein Msh2 isoform 2                                           | 3 |
| 127 | 112363080 | microtubule-associated serine/threonine-protein kinase 2                             | 3 |
| 128 | 21956645  | myotrophin                                                                           | 3 |
| 129 | 148612885 | ADP-ribosylation factor-like protein 2 isoform 1                                     | 3 |
| 130 | 281182700 | WASH complex subunit FAM21C isoform 3                                                | 3 |
| 131 | 263191589 | DNA mismatch repair protein Mlh1 isoform 2                                           | 3 |
| 132 | 49472841  | A-kinase anchor protein 8-like                                                       | 3 |
| 133 | 13491166  | pumilio homolog 1 isoform 2                                                          | 3 |
| 134 | 188528641 | SEC14 domain and spectrin repeat-containing protein 1                                | 3 |
| 135 | 22907034  | folliculin isoform 1                                                                 | 3 |
| 136 | 332635087 | phosphatidylinositol-binding clathrin assembly protein isoform 4                     | 3 |
| 137 | 20070260  | negative elongation factor B                                                         | 3 |
| 138 | 71772415  | 40S ribosomal protein S15a                                                           | 3 |
| 139 | 343887347 | CD2 antigen cytoplasmic tail-binding protein 2                                       | 3 |
| 140 | 282165733 | RUN and FYVE domain-containing protein 4                                             | 3 |
| 141 | 21361657  | protein disulfide-isomerase A3 precursor                                             | 3 |
| 142 | 4506189   | proteasome subunit alpha type-7                                                      | 3 |
| 143 | 8922331   | protein mago nashi homolog 2                                                         | 3 |
| 144 | 216547519 | interleukin-1 receptor-associated kinase 3 isoform a                                 | 3 |
| 145 | 303227928 | matrin-3 isoform b                                                                   | 3 |
| 146 | 375151575 | liprin-beta-2 isoform 3                                                              | 3 |
| 147 | 304434687 | serine/threonine-protein phosphatase 6 regulatory ankyrin repeat subunit B isoform B | 3 |
| 148 | 27734925  | uncharacterized protein C3orf33                                                      | 3 |
| 149 | 296011003 | abl interactor 1 isoform I                                                           | 3 |
| 150 | 20070220  | protein arginine N-methyltransferase 5 isoform a                                     | 3 |
| 151 | 4506711   | 40S ribosomal protein S27                                                            | 3 |
| 152 | 386643034 | protein NDRG1 isoform 3                                                              | 3 |
| 153 | 4502749   | cyclin-dependent kinase inhibitor 2A isoform p16INK4a                                | 3 |
| 154 | 61742814  | coiled-coil and C2 domain-containing protein 1B                                      | 2 |
| 155 | 11125770  | aminoacyl tRNA synthase complex-interacting multifunctional protein 2                | 2 |
| 156 | 56549117  | dynamin-1 isoform 2                                                                  | 2 |
| 157 | 4505913   | mismatch repair endonuclease PMS2 isoform a                                          | 2 |
| 158 | 31742503  | histone H3.2                                                                         | 2 |
| 159 | 120587025 | SH3 and multiple ankyrin repeat domains protein 1                                    | 2 |

|     |           |                                                                                                                         |   |
|-----|-----------|-------------------------------------------------------------------------------------------------------------------------|---|
| 160 | 115430237 | spectrin beta chain, non-erythrocytic 4 isoform sigma1                                                                  | 2 |
| 161 | 56550086  | WD repeat and HMG-box DNA-binding protein 1 isoform 2                                                                   | 2 |
| 162 | 110347568 | centrosomal protein of 152 kDa isoform 2                                                                                | 2 |
| 163 | 78217386  | rab GTPase-activating protein 1-like isoform A                                                                          | 2 |
| 164 | 343403796 | NEDD8 ultimate buster 1 isoform 2                                                                                       | 2 |
| 165 | 145309300 | cyclin-dependent kinase 13 isoform 2<br>arf-GAP with GTPase, ANK repeat and PH domain-containing protein 3<br>isoform a | 2 |
| 166 | 110227613 |                                                                                                                         | 2 |
| 167 | 217330559 | serine/threonine-protein kinase ULK2                                                                                    | 2 |
| 168 | 359338991 | heterogeneous nuclear ribonucleoprotein Q isoform 7                                                                     | 2 |
| 169 | 5032087   | splicing factor 3A subunit 1 isoform 1                                                                                  | 2 |
| 170 | 41393563  | kinesin-like protein KIF1B isoform b                                                                                    | 2 |
| 171 | 112181295 | xyloside xylosyltransferase 1                                                                                           | 2 |
| 172 | 21389577  | AP-4 complex accessory subunit tepsin                                                                                   | 2 |
| 173 | 89363017  | collagen alpha-2(V) chain preproprotein                                                                                 | 2 |
| 174 | 209863002 | MAP kinase-activating death domain protein isoform j                                                                    | 2 |
| 175 | 156766047 | PERQ amino acid-rich with GYF domain-containing protein 2 isoform c                                                     | 2 |
| 176 | 40548403  | mRNA-decapping enzyme 1B                                                                                                | 2 |
| 177 | 90819233  | afadin isoform 2                                                                                                        | 2 |
| 178 | 57529246  | ubiquitin carboxyl-terminal hydrolase 19 isoform 4                                                                      | 2 |
| 179 | 9966867   | eukaryotic translation initiation factor 5A-2                                                                           | 2 |
| 180 | 221316716 | proteasome subunit alpha type-1 isoform 3                                                                               | 2 |
| 181 | 156938331 | pre-mRNA-processing factor 39                                                                                           | 2 |
| 182 | 221219026 | pleckstrin homology-like domain family B member 1 isoform b                                                             | 2 |
| 183 | 33149331  | nucleoredoxin isoform 1                                                                                                 | 2 |
| 184 | 296278204 | partitioning defective 3 homolog isoform 10                                                                             | 2 |
| 185 | 47834348  | minor histocompatibility protein HA-1 isoform 1                                                                         | 2 |
| 186 | 145301607 | thyroid adenoma-associated protein isoform a                                                                            | 2 |
| 187 | 41327773  | probable ATP-dependent RNA helicase DDX46                                                                               | 2 |
| 188 | 310110158 | PREDICTED: otogelin isoform 1                                                                                           | 2 |
| 189 | 387598060 | guanine nucleotide-binding protein G(olf) subunit alpha isoform 2                                                       | 2 |
| 190 | 7706457   | A-kinase anchor protein 11                                                                                              | 2 |
| 191 | 5802966   | destrin isoform a                                                                                                       | 2 |
| 192 | 23943858  | sorting nexin-8                                                                                                         | 2 |
| 193 | 22749199  | fragile X mental retardation 1 neighbor protein                                                                         | 2 |
| 194 | 319890246 | ropporin-1-like protein                                                                                                 | 2 |
| 195 | 5453557   | E3 ubiquitin-protein ligase ARIH2                                                                                       | 2 |
| 196 | 4502951   | collagen alpha-1(III) chain preproprotein                                                                               | 2 |
| 197 | 41393573  | ARF GTPase-activating protein GIT1 isoform 2                                                                            | 2 |
| 198 | 4758528   | hepatocyte growth factor-regulated tyrosine kinase substrate                                                            | 2 |
| 199 | 31881687  | replication factor C subunit 4                                                                                          | 2 |
| 200 | 226958663 | nuclear pore membrane glycoprotein 210-like isoform 2 precursor                                                         | 2 |
| 201 | 18379349  | synaptic vesicle membrane protein VAT-1 homolog                                                                         | 2 |
| 202 | 4755140   | type I inositol 3,4-bisphosphate 4-phosphatase isoform a                                                                | 2 |
| 203 | 51988887  | E3 ubiquitin-protein ligase SH3RF1                                                                                      | 2 |
| 204 | 392494084 | eukaryotic translation initiation factor 6 isoform a                                                                    | 2 |
| 205 | 166362732 | ETS domain-containing protein Elk-1 isoform a                                                                           | 2 |
| 206 | 289577098 | protein Shroom1 isoform 1                                                                                               | 2 |
| 207 | 189458812 | 1,4-alpha-glucan-branching enzyme                                                                                       | 2 |
| 208 | 87239981  | tankyrase-1                                                                                                             | 2 |
| 209 | 23238222  | COP9 signalosome complex subunit 3 isoform 1                                                                            | 2 |
| 210 | 73747879  | WD repeat-containing protein 7 isoform 2                                                                                | 2 |
| 211 | 300796323 | retinoblastoma-binding protein 5 isoform 2                                                                              | 2 |
| 212 | 82880674  | cerebral dopamine neurotrophic factor precursor                                                                         | 2 |
| 213 | 188035877 | probable ATP-dependent RNA helicase DDX59                                                                               | 2 |
| 214 | 110224465 | GPI mannosyltransferase 3                                                                                               | 2 |
| 215 | 315259084 | integrator complex subunit 7 isoform 4                                                                                  | 2 |

|     |           |                                                                      |   |
|-----|-----------|----------------------------------------------------------------------|---|
| 216 | 165905613 | RNA-binding protein MEX3D isoform 1                                  | 2 |
| 217 | 4505585   | platelet-activating factor acetylhydrolase IB subunit beta isoform a | 2 |
| 218 | 24432026  | kelch-like protein 22                                                | 2 |
| 219 | 4557367   | bleomycin hydrolase                                                  | 2 |
| 220 | 4557493   | cleavage stimulation factor subunit 2                                | 2 |
| 221 | 381214353 | DIS3-like exonuclease 2 isoform 3                                    | 2 |
| 222 | 126722969 | centromere protein T                                                 | 2 |
| 223 | 166064025 | cyclin-dependent kinase-like 3 isoform 2                             | 2 |
| 224 | 7706497   | UMP-CMP kinase isoform a                                             | 2 |
| 225 | 50428938  | ATPase ASNA1                                                         | 2 |
| 226 | 62460633  | protein SCAF8                                                        | 2 |
| 227 | 30089948  | protein phosphatase 1E                                               | 2 |
| 228 | 15011936  | 40S ribosomal protein S26                                            | 2 |
| 229 | 21361559  | visinin-like protein 1                                               | 2 |
| 230 | 23957690  | conserved oligomeric Golgi complex subunit 7                         | 2 |
| 231 | 37675283  | AP-4 complex subunit epsilon-1 isoform 1                             | 2 |
| 232 | 379056383 | DNA polymerase delta subunit 2 isoform 1                             | 2 |
| 233 | 61966721  | tctex1 domain-containing protein 4                                   | 2 |
| 234 | 307574691 | transforming growth factor beta receptor type 3 isoform b precursor  | 2 |
| 235 | 118402586 | lactoylglutathione lyase                                             | 2 |
| 236 | 123173757 | ribonucleoprotein PTB-binding 1                                      | 2 |
| 237 | 222418631 | proton-coupled amino acid transporter 2                              | 2 |
| 238 | 389565487 | programmed cell death protein 6 isoform 4                            | 2 |
| 239 | 13129078  | tether containing UBX domain for GLUT4 isoform 1                     | 2 |
| 240 | 217035118 | TBC1 domain family member 23 isoform 2                               | 2 |
| 241 | 306966160 | leucine-rich repeat-containing protein 3C precursor                  | 2 |
| 242 | 45359859  | growth factor receptor-bound protein 2 isoform 2                     | 2 |
| 243 | 4885413   | histidine triad nucleotide-binding protein 1                         | 2 |
| 244 | 10835049  | transforming protein RhoA precursor (RhoA?)                          | 2 |
| 245 | 151101404 | prothymosin alpha isoform 2                                          | 2 |
| 246 | 485837026 | spectrin beta chain, non-erythrocytic 5                              | 2 |
| 247 | 39777614  | calcium-responsive transactivator                                    | 2 |

---
